# Supplementary material for: Effects of post-activation protocols based on slow tempo bodyweight squat and isometric activity on vertical jump height enhancement in trained males: a randomized controlled trial
Source: PeerJ. 2023 Aug 15;11:e15753. doi: 10.7717/peerj.15753 (PMC10437033; doi:10.7717/peerj.15753)
Supplement: Supplemental Information 1 [file peerj-11-15753-s001.xlsx]

## Sheet: OG Dane
participant number	type of intervention	strength training experience [years]	body height [m]	age [years]	body weight [kg]	body mass index [kg/m2]	cmj baseline trial [cm]	cmj 3rd minute trial [cm]	cmj 5th minute trial [cm]	cmj 7th minute trial [cm]	cmj 9th minute trial [cm]	the best cmj result [cm]	minute when the best cmj height [cm] occured	the difference [cm] between best post-intervention cmj and baseline cmj
32	control	6	1.77	20	78	24.8971	32.3	32	32.1	31.3	30.9	32.1	0	-0.2
33	control	3	1.82	21	86	25.963	39.3	38.7	38	36.7	38	38.7	0	-0.6
34	control	6	1.85	19	75	21.9138	40.8	41.5	42.1	41.2	41.2	42.1	5	1.3
35	control	5	1.68	22	69	24.4473	36.1	35.1	33.5	35	35.1	35.1	0	-1
36	control	4	1.85	18	78.3	22.878	35.1	35.3	36.8	31.8	34.3	36.8	5	1.7
37	control	4	1.72	21	77.2	26.0952	34.8	32.9	34.3	32.4	33.7	34.3	0	-0.5
38	control	4	1.81	20	75	22.8931	40.8	42	41	42.2	41.7	42.2	7	1.4
39	control	4	1.78	19	76	23.9869	40.2	40.5	40.2	40	40.1	40.5	3	0.3
40	control	3	1.69	19	83	29.0606	36.7	35.2	35.2	36.3	35.7	36.3	0	-0.4
41	control	6	1.81	21	78	23.8088	39.3	39.8	40.5	40.5	40	40.5	5	1.2
15	slow tempo and isometry	5	1.84	19	69.5	20.5281	44.4	42.2	43.7	42.2	44.3	44.3	0	-0.1
16	slow tempo and isometry	4	1.77	19	71.5	22.8223	35.2	36.4	36.4	35	38	38	9	2.8
17	slow tempo and isometry	3	1.82	19	77.3	23.3366	33.3	30.8	31.1	32	34.6	34.6	9	1.3
19	slow tempo and isometry	3	1.71	19	65.8	22.5027	33.7	32.8	36.9	35.9	36.3	36.9	5	3.2
20	slow tempo and isometry	4	1.91	19	85.6	23.4643	35.3	34.4	36.3	34.3	36.7	36.7	9	1.4
21	slow tempo and isometry	4	1.81	19	71.9	21.9468	43.7	40.7	40.2	38.2	45	45	9	1.3
22	slow tempo and isometry	4	1.76	20	70.8	22.8564	46.5	46.1	47.1	45	48.3	48.3	9	1.8
23	slow tempo and isometry	6	1.73	20	60.8	20.3147	46.7	41.2	42.8	44.9	49.4	49.4	9	2.7
24	slow tempo and isometry	6	1.82	19	92.5	27.9254	38.6	38.9	38.3	39.1	40.2	40.2	9	1.6
25	slow tempo and isometry	4	1.81	23	68.2	20.8174	25.2	23.6	25	23.5	27.7	27.7	9	2.5
26	slow tempo and isometry	4	1.77	20	71.8	22.9181	42.4	38.7	39	39.1	43.7	43.7	9	1.3
27	slow tempo and isometry	6	1.89	21	85.6	23.9635	36.5	35.5	36.1	37.4	38.3	38.3	9	1.8
28	slow tempo and isometry	3	1.96	18	88.4	23.0112	24.9	23.2	24.6	24.2	25.4	25.4	9	0.5
29	slow tempo and isometry	3	1.76	22	76	24.5351	36.9	41.5	41	39.3	36.9	41.5	3	4.6
30	slow tempo and isometry	4	1.77	23	78	24.8971	41	41.1	42.5	41.8	41	42.5	3	1.5
18	slow tempo and isometry	5	1.77	19	65.9	21.0348	39.4	40.2	40.8	37.2	40	40.8	5	1.4
31	slow tempo and isometry	6	1.83	19	88.1	26.3071	42.2	40.7	41.2	42.1	41.7	42.1	0	-0.1
1	only isometry	5	1.78	18	71.3	22.5035	30.5	29.4	31	31.4	29.1	31.4	7	0.9
2	only isometry	6	1.88	19	82.8	23.4269	30.1	30.9	28.5	29	28.6	30.9	3	0.8
3	only isometry	3	1.85	19	72.9	21.3002	33.7	33.1	29.6	32.3	32.8	33.1	0	-0.6
4	only isometry	3	1.76	19	60.7	19.5958	40.2	41.8	40.2	40.8	41.8	41.8	3	1.6
5	only isometry	3	1.78	19	65	20.5151	41.7	39.8	39.3	39.4	40.7	40.7	0	-1
6	only isometry	3	1.87	18	78.3	22.3913	37.5	34.8	37.4	36.9	38.3	38.3	9	0.8
7	only isometry	6	1.68	19	59.4	21.0459	36.3	34.6	34.4	37.1	34.8	37.1	7	0.8
8	only isometry	6	1.85	18	78.3	22.878	32.8	32.9	33.5	30.9	34.2	34.2	9	1.4
9	only isometry	4	1.79	19	77	24.0317	41.7	42.2	40.1	43.4	41.7	43.4	7	1.7
10	only isometry	9	1.86	19	34.9	10.0879	32.4	29.7	31.4	31.4	31.6	31.6	0	-0.8
11	only isometry	6	1.83	19	83.3	24.8738	44.3	42.8	45.8	45.6	45.3	45.8	3	1.5
12	only isometry	6	1.97	18	81	20.8714	35.6	36.9	36.1	37.2	39	39	9	3.4
14	only isometry	8	1.79	24	78	24.3438	40	41.8	42.5	41.1	41	42.5	5	2.5
13	only isometry	3	1.81	19	63.6	19.4133	41.5	40.1	37.6	40	41.7	41.7	9	0.2
